# Supplementary material for: Response of Net Primary Productivity of Zambezi teak forests to climate change along a rainfall gradient in Zambia
Source: Copernicus journal article supplement (doi:10.5194/bg-2018-421), 2018-10-24
Supplement: Supplementary file 1 [file bg-2018-421-supplement.pdf]

1 **Supplementary information**

2 **Table S1.** Soil physical and chemical properties used for the simulations in LPJ-GUESS model

| Site           | Horizon (cm)         | 0 - 10 | 10 -20. | 20 - 30 | 30 - 50 | 50 - 100 | 100 - 120 | 120 - 150 | Average value |
|----------------|----------------------|--------|---------|---------|---------|----------|-----------|-----------|---------------|
| <b>Sesheke</b> | Nitrogen (%)         | 0.02   | 0.03    | 0.03    | 0.03    | 0.03     | 0.03      | 0.03      | 0.03          |
|                | Clay (%)             | 0.43   | 0.43    | 0.43    | 0.60    | 0.60     | 0.60      | 0.60      | 0.53          |
|                | Silt (%)             | 0.46   | 0.49    | 0.46    | 0.60    | 0.60     | 0.60      | 0.60      | 0.54          |
|                | Fine sand (%)        | 36.07  | 36.15   | 36.74   | 35.20   | 36.40    | 35.50     | 32.50     | 35.51         |
|                | Course sand (%)      | 63.04  | 62.94   | 62.37   | 63.60   | 62.40    | 63.30     | 66.30     | 63.42         |
|                | pH-H2O               | 5.60   | 5.60    | 5.60    | 5.61    | 5.43     | 5.43      | 5.60      | 5.55          |
|                | Organic carbon (%)   | 0.75   | 0.68    | 0.64    | 1.16    | 0.78     | 0.67      | 0.74      | 0.77          |
|                | Bulky density (g/m3) | 1.46   | 1.50    | 1.55    | 1.57    | 1.60     | 1.56      | 1.56      | 1.54          |
| <b>Namwala</b> | Nitrogen (%)         | 0.03   | 0.03    | 0.03    | 0.04    | 0.03     | 0.03      | 0.03      | 0.03          |
|                | Clay (%)             | 0.60   | 0.56    | 0.60    | 0.60    | 0.51     | 0.51      | 0.51      | 0.56          |
|                | Silt (%)             | 0.34   | 0.46    | 0.53    | 0.69    | 0.69     | 0.60      | 0.57      | 0.55          |
|                | Fine sand (%)        | 59.81  | 62.77   | 62.81   | 63.74   | 61.77    | 63.96     | 67.67     | 63.22         |
|                | Course sand (%)      | 39.26  | 36.21   | 36.11   | 35.11   | 37.03    | 34.94     | 31.24     | 35.70         |
|                | pH-H2O               | 5.76   | 5.77    | 5.72    | 5.67    | 5.69     | 5.74      | 5.80      | 5.74          |
|                | Organic carbon (%)   | 0.98   | 0.60    | 0.86    | 0.83    | 0.53     | 0.71      | 0.60      | 0.73          |
|                | Bulky density (g/m3) | 1.53   | 1.58    | 1.53    | 1.52    | 1.51     | 1.53      | 1.50      | 1.53          |
| <b>Kabompo</b> | Nitrogen (%)         | 0.04   | 0.04    | 0.04    | 0.04    | 0.04     | 0.04      | 0.03      | 0.04          |
|                | Clay (%)             | 0.29   | 0.41    | 0.36    | 0.26    | 0.09     | 0.09      | 0.17      | 0.31          |
|                | Silt (%)             | 0.60   | 0.47    | 0.63    | 0.37    | 0.60     | 0.71      | 0.63      | 0.43          |
|                | Fine sand (%)        | 25.57  | 24.74   | 26.41   | 25.87   | 23.99    | 27.36     | 26.56     | 24.89         |
|                | Course sand (%)      | 73.54  | 74.36   | 72.60   | 73.50   | 75.33    | 71.84     | 72.73     | 74.31         |
|                | pH-H2O               | 5.88   | 6.02    | 5.96    | 5.80    | 5.91     | 5.84      | 5.63      | 5.86          |
|                | Organic carbon (%)   | 1.13   | 1.10    | 1.01    | 1.06    | 0.66     | 0.58      | 0.76      | 0.90          |
|                | Bulky density (g/m3) | 1.56   | 1.65    | 1.70    | 2.00    | 1.98     | 2.09      | 2.12      | 1.87          |

3

4

5

6 **Table S2.** Resolutions of all Global Circulation Models (GCMs) and characteristics of RCP 4.5 and RCP 8.5

| <b>Global Circulation Models (GCMs) resolution</b>                                                                                                                           |                                                                                                                                                                               |                          |                                                                                                                                                                                                                                                                                              |                          |                                                  |
|------------------------------------------------------------------------------------------------------------------------------------------------------------------------------|-------------------------------------------------------------------------------------------------------------------------------------------------------------------------------|--------------------------|----------------------------------------------------------------------------------------------------------------------------------------------------------------------------------------------------------------------------------------------------------------------------------------------|--------------------------|--------------------------------------------------|
| <b>Model</b>                                                                                                                                                                 | <b>CNRM-CM5.1</b>                                                                                                                                                             | <b>EC-Earth</b>          | <b>HADGEM2-ES</b>                                                                                                                                                                                                                                                                            | <b>IPSL-CM5A-LR</b>      | <b>MPI-ESM-LR</b>                                |
| Development Centre                                                                                                                                                           | CNRM-GAME & CERFACS                                                                                                                                                           | ECMWF                    | Met Office Hadley                                                                                                                                                                                                                                                                            | ICMC                     | MPI                                              |
| Horizontal resolution                                                                                                                                                        | T127 ~ 1.4°~ 155km                                                                                                                                                            | T159 ~ 1.125° ~ 125km    | 1.25°×1.875° ~ 139km×208km                                                                                                                                                                                                                                                                   | 1.9°×3.75° ~ 211km×416km | T63 ~ 1.9° ~ 211km                               |
| Vertical resolution                                                                                                                                                          | L31                                                                                                                                                                           | L62                      | L38                                                                                                                                                                                                                                                                                          | L39                      | L47                                              |
| References                                                                                                                                                                   | (Voltaire et al., 2013)                                                                                                                                                       | (Hazeleger et al., 2011) | (Collins et al., 2011)                                                                                                                                                                                                                                                                       | (Dufresne et al., 2013)  | (Giorgetta et al., 2016; Jungclaus et al., 2013) |
| <b>Representative Concentration Pathways (RCPs)</b>                                                                                                                          |                                                                                                                                                                               |                          |                                                                                                                                                                                                                                                                                              |                          |                                                  |
| <b>RCP</b>                                                                                                                                                                   | <b>RCP 8.5</b>                                                                                                                                                                |                          | <b>RCP 4.5</b>                                                                                                                                                                                                                                                                               |                          |                                                  |
| Radiative forcing                                                                                                                                                            | >8.5 W/m <sup>2</sup> in 2100                                                                                                                                                 |                          | ~ 4.5 W/m <sup>2</sup> at stabilization by 2100                                                                                                                                                                                                                                              |                          |                                                  |
| Concentration (ppm)                                                                                                                                                          | >1370 CO <sub>2</sub> -equiv. in 2100                                                                                                                                         |                          | ~650 CO <sub>2</sub> -equiv. (at stabilization after 2100)                                                                                                                                                                                                                                   |                          |                                                  |
| Pathway                                                                                                                                                                      | Rising                                                                                                                                                                        |                          | Stabilization without overshoot                                                                                                                                                                                                                                                              |                          |                                                  |
| Characteristics                                                                                                                                                              | Lower rate of technology development, heavy reliance on fossil fuels, high energy intensity, and increased use of croplands and grassland driven by an increase in population |                          | Lower energy intensity, strong reforestation programmes, decreasing use of croplands and grasslands due to yield increases and dietary changes, strong climate policies and stable methane emissions. CO <sub>2</sub> emissions increase only slightly before decline commences around 2040. |                          |                                                  |
| Reference                                                                                                                                                                    | (Moss et al., 2010; Riahi et al., 2011; Vuuren et al., 2011)                                                                                                                  |                          | (Moss et al., 2010; Riahi et al., 2011; Vuuren et al., 2011)                                                                                                                                                                                                                                 |                          |                                                  |
| <b>Meaning of acronyms:</b>                                                                                                                                                  |                                                                                                                                                                               |                          |                                                                                                                                                                                                                                                                                              |                          |                                                  |
| CNRM-CM5.1 - Centre National de Recherches Météorologiques -Circulation Model version 5                                                                                      |                                                                                                                                                                               |                          |                                                                                                                                                                                                                                                                                              |                          |                                                  |
| EC-EARTH - European Centre Earth model                                                                                                                                       |                                                                                                                                                                               |                          |                                                                                                                                                                                                                                                                                              |                          |                                                  |
| HADGEM2-ES - Hadley Global Environment Model 2 - Earth System                                                                                                                |                                                                                                                                                                               |                          |                                                                                                                                                                                                                                                                                              |                          |                                                  |
| IPSL-CM5A-LR - Institut Pierre Simon Laplace – Circulation Model 5A- Running on low resolution grid                                                                          |                                                                                                                                                                               |                          |                                                                                                                                                                                                                                                                                              |                          |                                                  |
| MPI-ESM-LR - Max-Planck-Institut für Meteorologie – Earth System Models - Running on low resolution grid                                                                     |                                                                                                                                                                               |                          |                                                                                                                                                                                                                                                                                              |                          |                                                  |
| ECMWF - European Centre for Medium-Range Weather Forecasts                                                                                                                   |                                                                                                                                                                               |                          |                                                                                                                                                                                                                                                                                              |                          |                                                  |
| MPI - Max-Planck-Institut für Meteorologie                                                                                                                                   |                                                                                                                                                                               |                          |                                                                                                                                                                                                                                                                                              |                          |                                                  |
| ICMC - Institut Pierre Simon Laplace Climate Modelling Centre                                                                                                                |                                                                                                                                                                               |                          |                                                                                                                                                                                                                                                                                              |                          |                                                  |
| CNRM-GAME & CERFACS - Centre National de Recherches Météorologiques — Groupe d'étude de l'Atmosphère Météorologique and Centre Européen de Recherche et de Formation Avancée |                                                                                                                                                                               |                          |                                                                                                                                                                                                                                                                                              |                          |                                                  |
| T – Triangular truncation (horizontally) at wave numbers 127, 159, and 63 for the respective models                                                                          |                                                                                                                                                                               |                          |                                                                                                                                                                                                                                                                                              |                          |                                                  |
| L – Level – Vertical distance from the ground level                                                                                                                          |                                                                                                                                                                               |                          |                                                                                                                                                                                                                                                                                              |                          |                                                  |

7

8

9

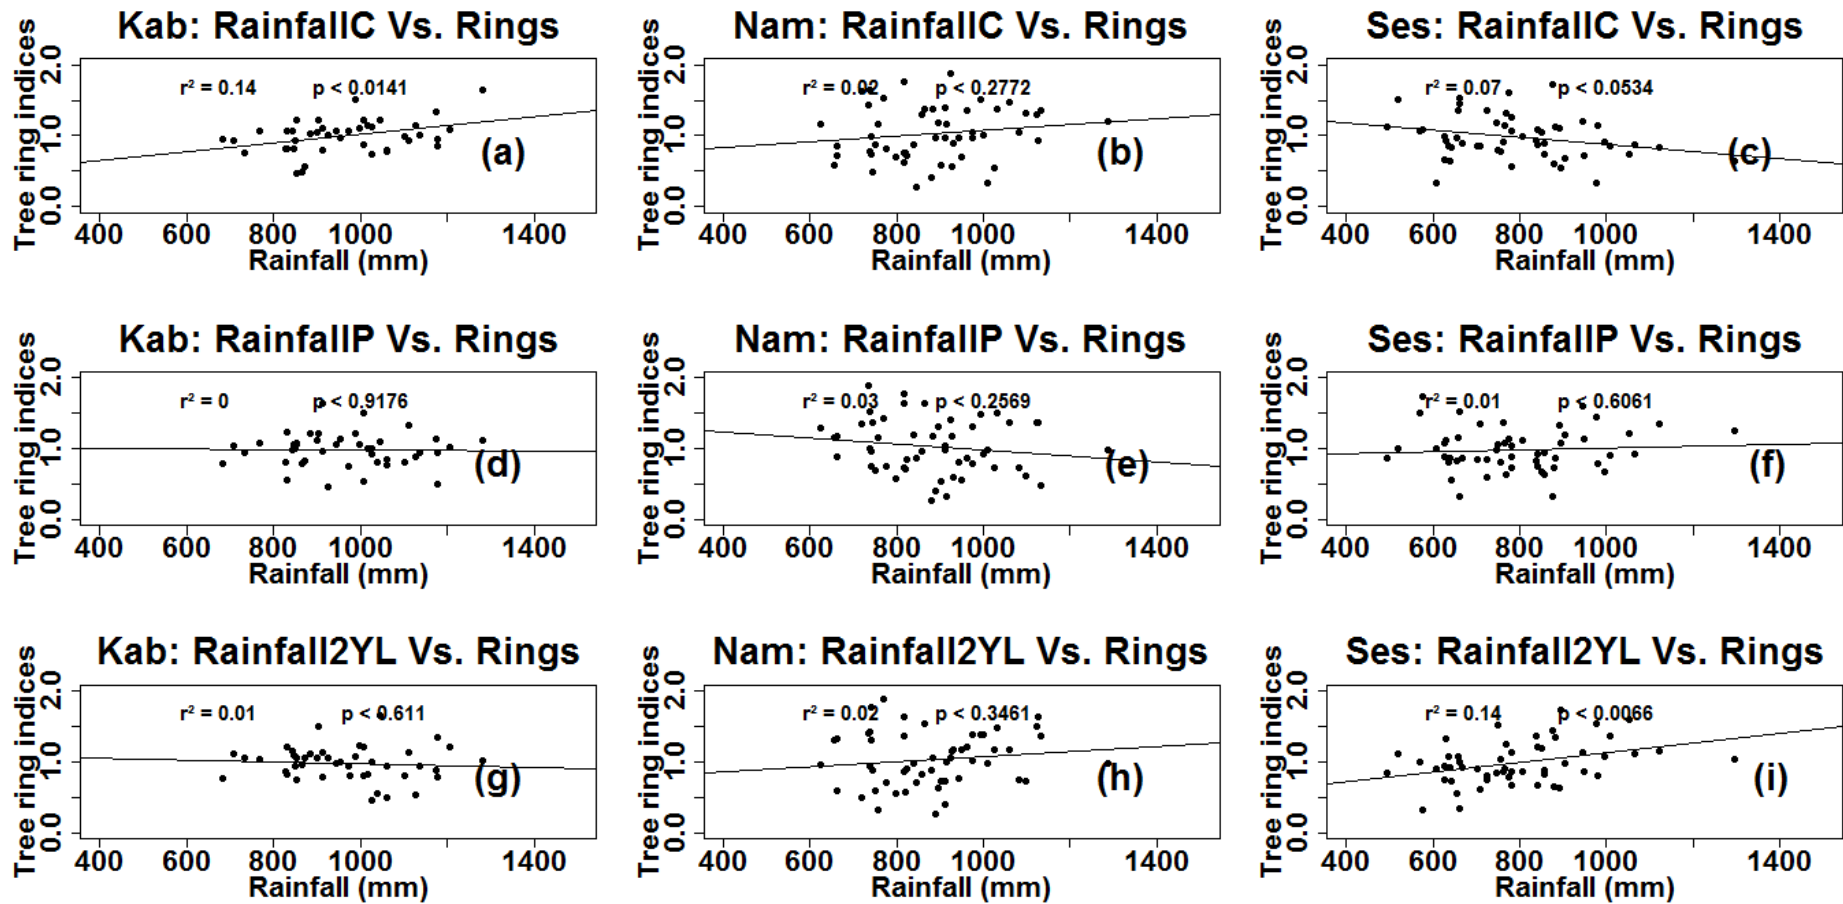

10 **Figure S1.** Correlations between tree-ring indices and observed local total annual rainfall of the current year (a, b, and c), previous year (d, e, and f), and of the previous two  
 11 years (g, h, and i) at Kabompo, Namwala and Sesheke. Kab stands for Kabompo, Nam denotes Namwala, and Ses means Sesheke. C denotes current year rainfall, P is  
 12 previous year rainfall, and 2YL stands for the rainfall of previous two years.

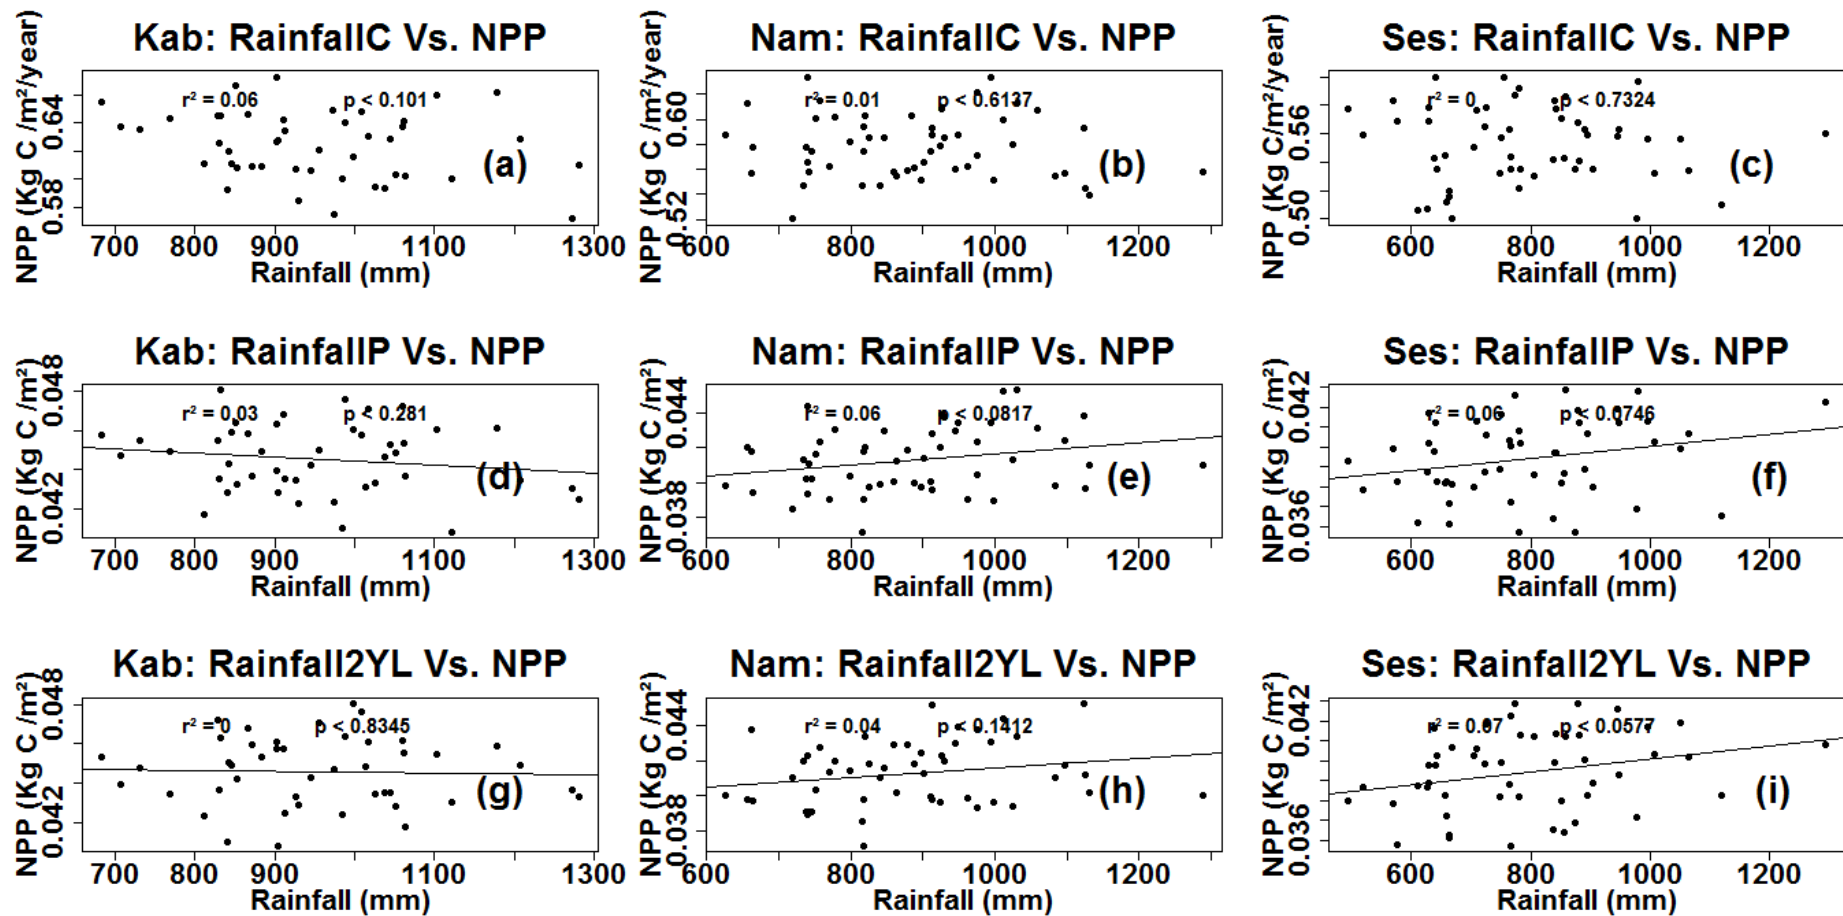

13 **Figure S2.** Correlations between NPP and observed local total annual rainfall of the current year (a, b, and c),  
 14 and i) at Kabompo, Namwala and Sesheke. Kab stands for Kabompo, Nam denotes Namwala, and Ses means Sesheke. C denotes current year rainfall, P is previous year  
 15 rainfall, and 2YL stands for the rainfall of previous two years.

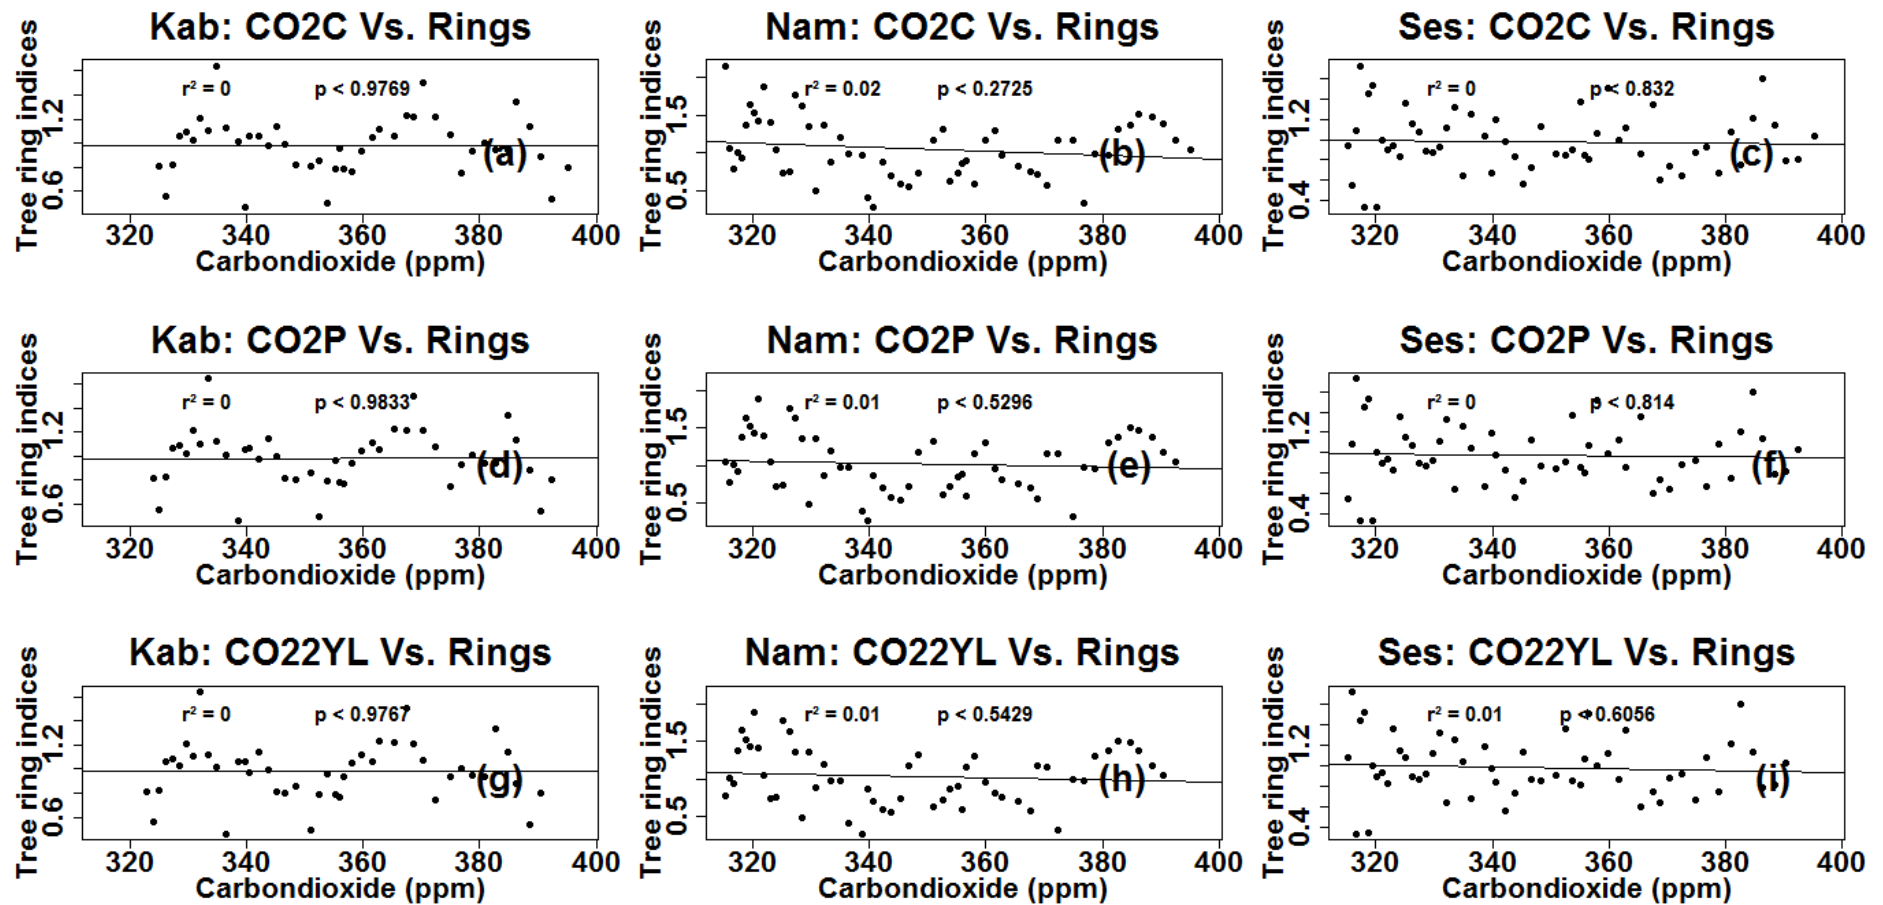

16 **Figure S3.** Correlations between tree-ring indices and carbon dioxide (CO<sub>2</sub>) of the current year (a, b, and c), previous year (d, e, and f), and of the previous two years (g, h,  
 17 and i) at Kabompo, Namwala and Sesheke. Kab stands for Kabompo, Nam denotes Namwala, and Ses means Sesheke. C denotes current year CO<sub>2</sub>, P is previous year CO<sub>2</sub>,  
 18 and 2YL stands for the CO<sub>2</sub> of previous two years.

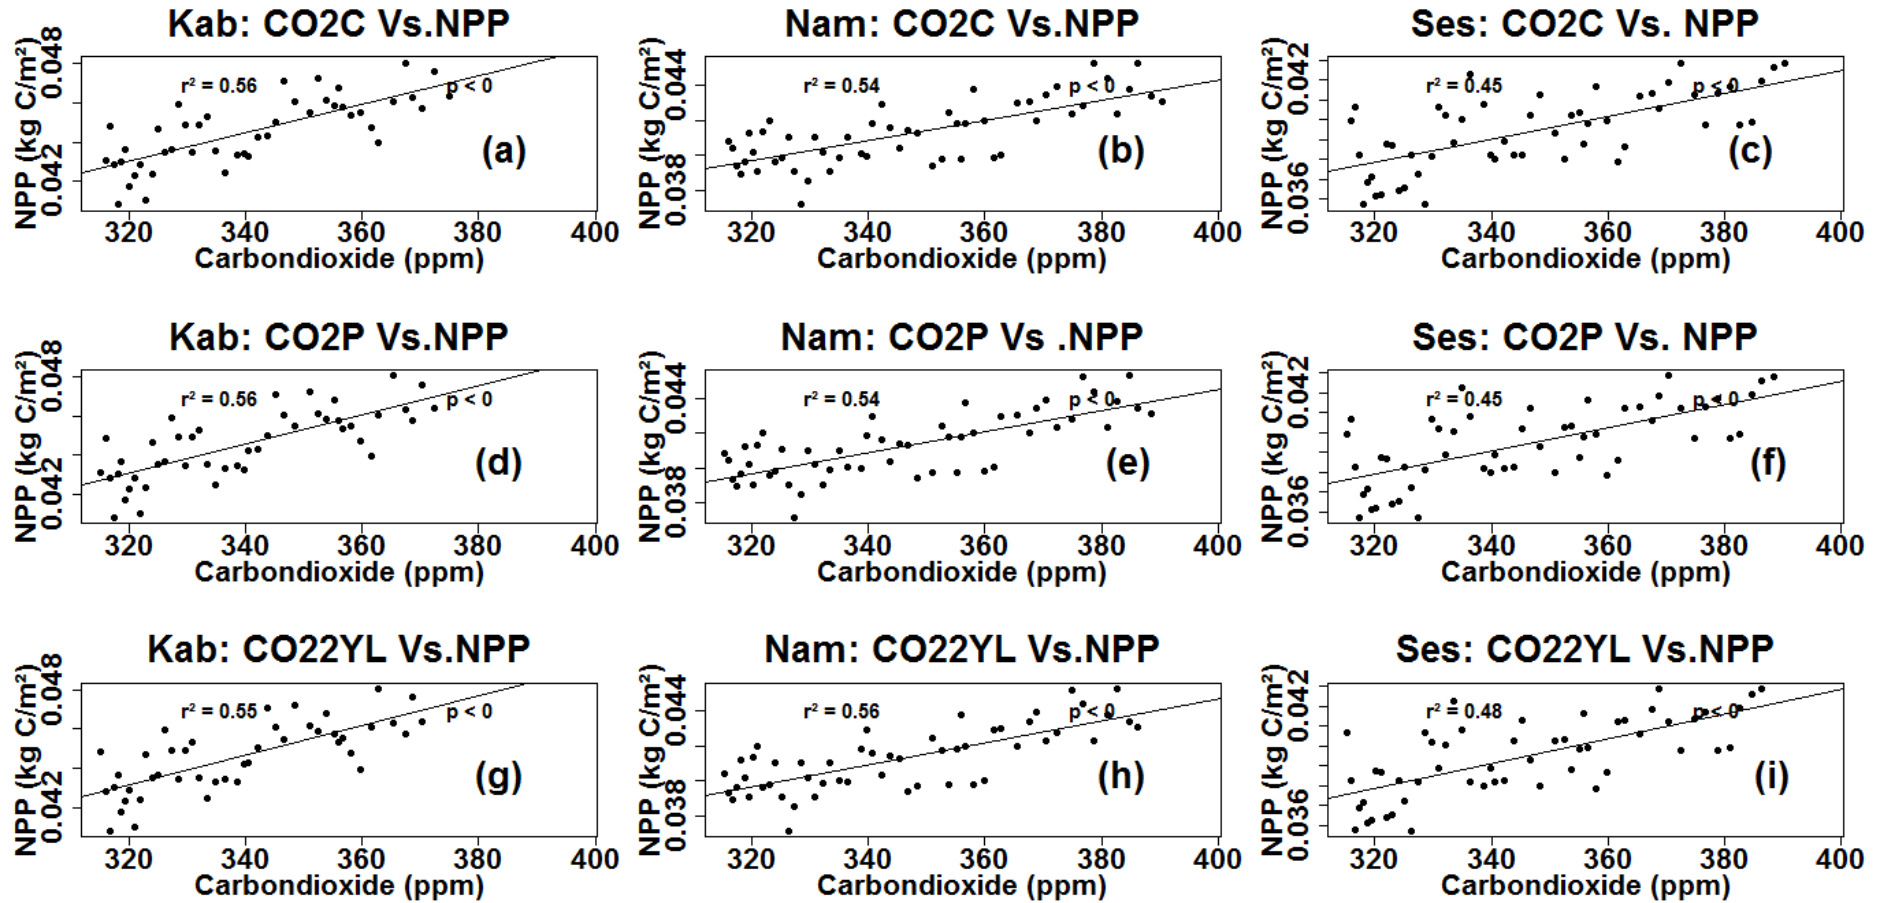

20 **Figure S4.** Correlations between NPP and carbon dioxide (CO<sub>2</sub>) of the current year (a, b, and c), previous year (d, e, and f), and of the previous two years (g, h, and i) at  
 21 Kabompo, Namwala and Sesheke. Kab stands for Kabompo, Nam denotes Namwala, and Ses means Sesheke. C denotes current year CO<sub>2</sub>, P is previous year CO<sub>2</sub>, and 2YL  
 22 stands for the CO<sub>2</sub> of previous two years.

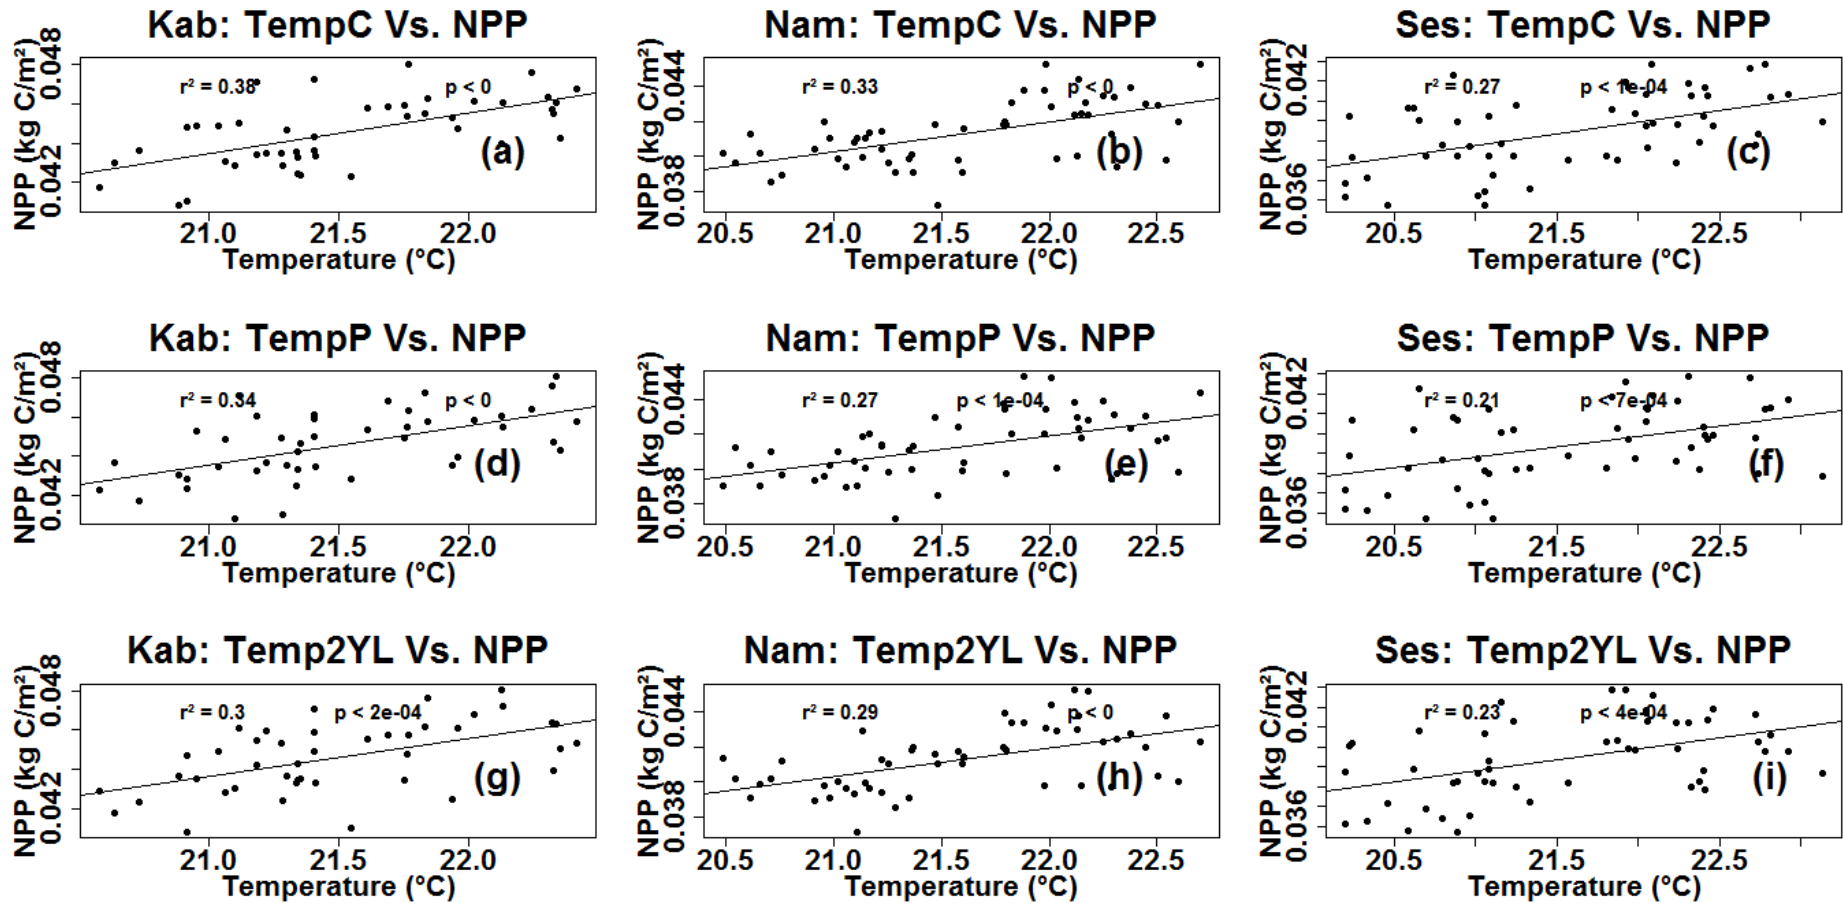

23

24 **Figure S5.** Correlations between NPP and observed local mean annual temperature of the current year (a, b, and c), previous year (d, e, and f), and of the previous two years  
 25 (g, h, and i) at Kabompo, Namwala and Sesheke. Kab stands for Kabompo, Nam denotes Namwala, Ses means Sesheke, and Temp stands for temperature. C denotes current  
 26 year temperature, P is previous year temperature, and 2YL stands for the temperature of previous two years.

27

## 28 **Supplementary References**

- 29 Collins, W. J., Bellouin, N., Doutriaux-Bouche, M., Gedney, N., Halloran, P., Hinton, T., Hughes, J., Jones, C. D., Joshi, M., Liddicoat, S., Martin, G., O'Connor, F., Rae, J.,  
30 Senior, C., Sitch, S., Totterdell, I., Wiltshire, A., and Woodward, S.: Development and evaluation of an Earth-System model – HadGEM2, *Geosci. Model Dev.*, 4, 1051–  
31 1075, 2011.
- 32 Dufresne, J.-L., Foujols, M.-A., Denvil, S., Caubel, A., Marti, O., Aumont, O., Balkanski, Y., Bekki, S., Bellenger, H., Benshila, R., Bony, S., Bopp, L., Braconnot, P.,  
33 Brockmann, P., Cadule, P., Cheruy, F., Codron, F., Cozic, A., Cugnet, D., de Noblet, N., Duvel, J.-P., Ethé, C., Fairhead, L., Fichet, T., Flavoni, S., Friedlingstein, P.,  
34 Grandpeix, J.-Y., Guez, L., Guilyardi, E., Hauglustaine, D., Hourdin, F., Idelkadi, A., Ghattas, J., Joussaume, S., Kageyama, M., Krinner, G., Labetoulle, S., Lahellec, A.,  
35 Lefebvre, M.-P., Lefevre, F., Levy, C., Li, Z. X., Lloyd, J., Lott, F., Madec, G., Mancip, M., Marchand, M., Masson, S., Meurdesoif, Y., Mignot, J., Musat, I., Parouty, S.,  
36 Polcher, J., Rio, C., Schulz, M., Swingedouw, D., Szopa, S., Talandier, C., Terray, P., Viovy, N., and Vuichard, N.: Climate change projections using the IPSL-CM5 Earth  
37 System Model: from CMIP3 to CMIP5, *Climate Dynamics*, 40, 2123-2165, 2013.
- 38 Giorgetta, M. A., Jungclaus, J., Reick, C. H., Legutke, S., Bader, J., Böttinger, M., Brovkin, V., Crueger, T., Esch, M., Fieg, K., Glushak, K., Gayler, V., Haak, H., Hollweg,  
39 H. D., Ilyina, T., Kinne, S., Kornbluh, L., Matei, D., Mauritsen, T., Mikolajewicz, U., Mueller, W., Notz, D., Pithan, F., Raddatz, T., Rast, S., Redler, R., Roeckner, E.,  
40 Schmidt, H., Schnur, R., Segsneider, J., Six, K. D., Stockhause, M., Timmreck, C., Wegner, J., Widmann, H., Wieners, K. H., Claussen, M., Marotzke, J., and Stevens, B.:  
41 Climate and carbon cycle changes from 1850 to 2100 in MPI-ESM simulations for the Coupled Model Intercomparison Project phase 5, *J. Adv. Model. Earth Syst.*, 5, 572-  
42 597, 2016.
- 43 Hazeleger, W., Wang, X., Severijns, C., tefănescu, S. S., Bintanja, R., Sterl, A., Wyser, K., Semmler, T., Yang, S., Van den Hurk, B., Van Noije, T., Van der Linden, E., and  
44 Van der Wiel, K.: EC-Earth V2.2: description and validation of a new seamless earth system prediction model, *Clim Dyn.*, . 2011.
- 45 Jungclaus, J. H., Fischer, N., Haak, H., Lohmann, K., Marotzke, J., Matei, D., Mikolajewicz, U., Notz, D., and Storch, J. S.: Characteristics of the ocean simulations in the  
46 Max Planck Institute Ocean Model (MPIOM) the ocean component of the MPI-Earth system model, *J. Adv. Model. Earth Syst.*, 5, 422-446, 2013.
- 47 Moss, R. H., Edmonds, J. A., Hibbard, K. A., Manning, M. R., Rose, S. K., van Vuuren, D. P., Carter, T. R., Emori, S., Kainuma, M., Kram, T., Meehl, G. A., Mitchell, J. F.,  
48 Nakicenovic, N., Riahi, K., Smith, S. J., Stouffer, R. J., Thomson, A. M., Weyant, J. P., and Wilbanks, T. J.: The next generation of scenarios for climate change research and  
49 assessment, *Nature*, 463, 747-756, 2010.
- 50 Riahi, K., Rao, S., Krey, V., Cho, C., Chirkov, V., Fischer, G., Kindermann, G., Nakicenovic, N., and Rafaj, P.: RCP 8.5-A scenario of comparatively high greenhouse gas  
51 emissions, *Climatic Change*, 109, 33-57, 2011.
- 52 Voltaire, A., Sanchez-Gomez, E., Salas y Méliá, D., Decharme, B., Cassou, C., Sénési, S., Valcke, S., Beau, I., Alias, A., Chevallier, M., Déqué, M., Deshayes, J., Douville,  
53 H., Fernandez, E., Madec, G., Maisonnave, E., Moine, M.-P., Planton, S., Saint-Martin, D., Szopa, S., Tyteca, S., Alkama, R., Belamari, S., Braun, A., Coquart, L., and  
54 Chauvin, F.: The CNRM-CM5.1 global climate model: description and basic evaluation, *Climate Dynamics*, 40, 2091-2121, 2013.
- 55 Vuuren, D. P., Edmonds, J., Kainuma, M., Riahi, K., Thomson, A., Hibbard, K., Hurtt, G. C., Kram, T., Krey, V., Lamarque, J.-F., Masui, T., Meinshausen, M., Nakicenovic,  
56 N., Smith, S. J., and Rose, S. K.: The representative concentration pathways: an overview, *Climatic Change*, 109, 5-31, 2011.

57
